# Supplementary material for: Superradiative plasmonic nanoantenna biosensors enable sensitive immunoassay using the naked eye
Source: Royal Society of Chemistry journal article supplement (doi:10.1039/d0nr06148d), 2020-12-28
Supplement: d0nr06148d1.pdf [file d0nr06148d1.pdf]

## Electronic Supporting Information

# Superradiative Plasmonic Nanoantenna Biosensors Enable Sensitive Immunoassay Using the Naked Eye

Yang Xiong,<sup>a</sup> Tong Fu,<sup>b</sup> Daxiao Zhang,<sup>b</sup> Shunping Zhang<sup>\*b</sup> and Hongxing Xu<sup>\*a,b</sup>

<sup>a</sup> The Institute for Advanced Studies, Wuhan University, Wuhan 430072, China.

<sup>b</sup> School of Physics and Technology, Center for Nanoscience and Nanotechnology, and Key Laboratory of Artificial Micro- and Nano-structures of Ministry of Education, Wuhan University, Wuhan 430072, China.

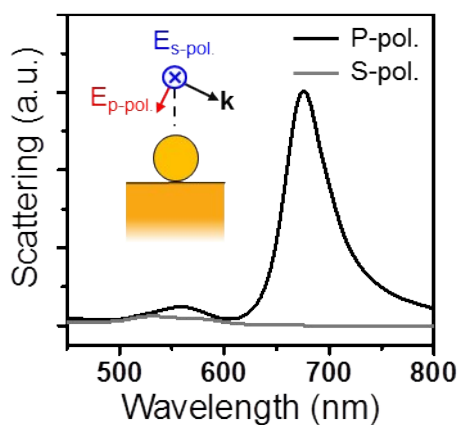

Fig. S1 Simulated scattering spectra of NPOM system under p-(black) and s-(gray) polarized light excitation.

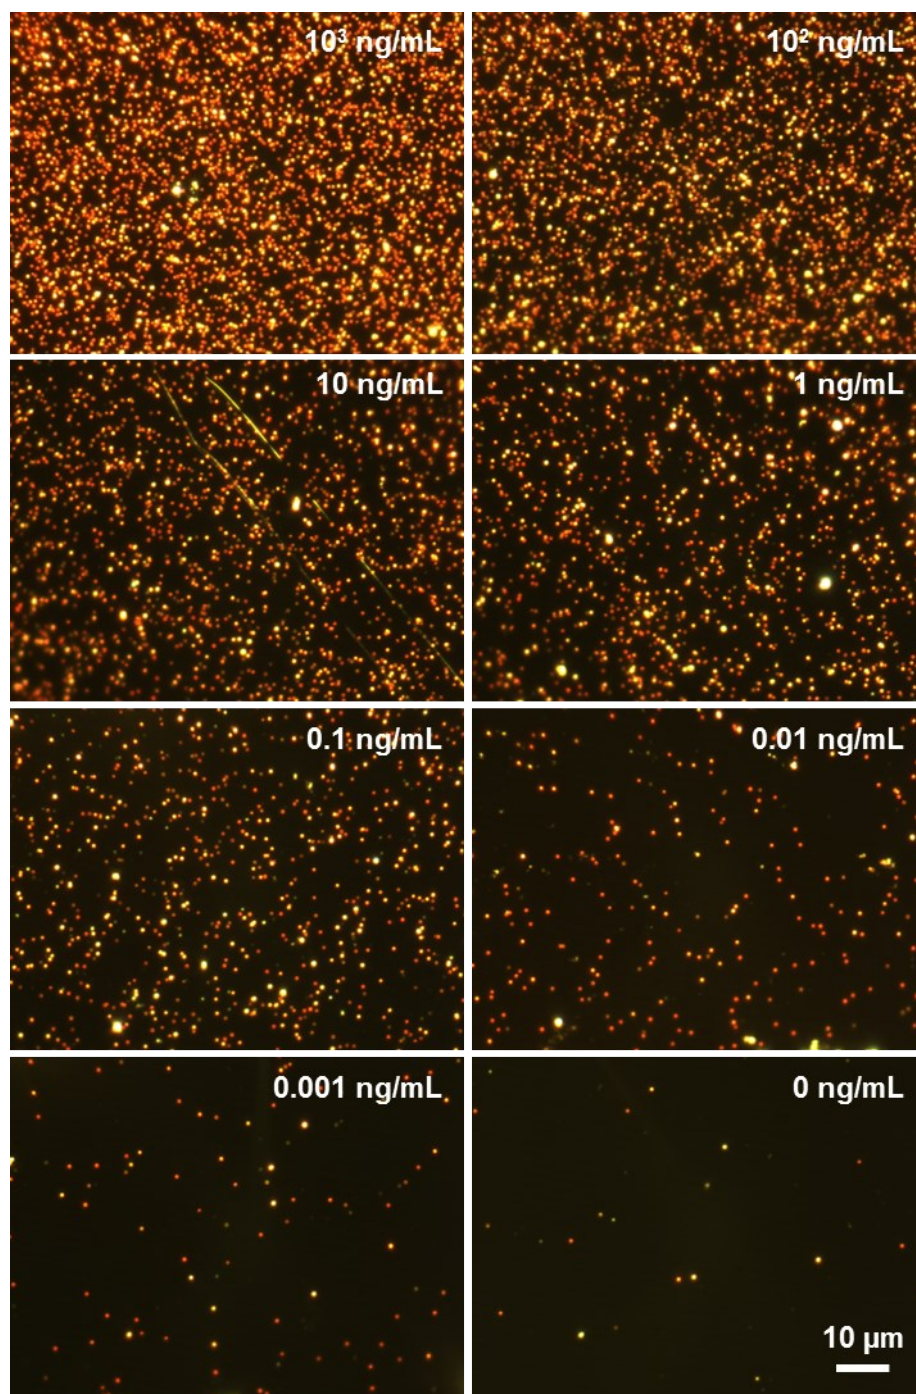

Fig. S2 Dark-field images for each concentration taken from the CCD camera.

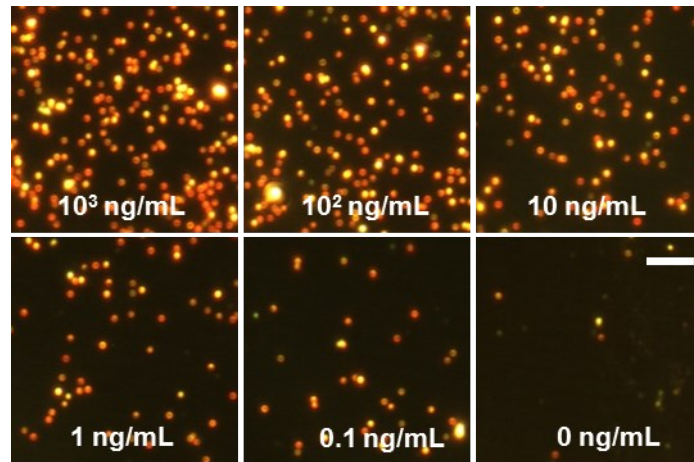

Fig. S3 Dark-field images of SERS-based immunoassay with different concentrations of human IgG. Scale bar is 5  $\mu\text{m}$ .

Table S1 The lowest detection limitations of IgG using various detection methods in previous works based on immunoassay.

| Method                    | Lowest detection limitation | Reference |
|---------------------------|-----------------------------|-----------|
| SERS                      | 5.33 aM                     | 1,2       |
| Fluorescence              | 0.30 fM                     | 3,4       |
| Surface plasmon resonance | 0.27 pM                     | 5,6       |
| Electrochemistry          | 0.67 aM                     | 7,8       |
| Dark-field microscope     | 9.74 pM                     | 9         |

Table S2 Comparison of relative standard deviations of SERS peak intensity at 1587 cm<sup>-1</sup> and particle density of DFM methods (Fig. 3d).

| Concentration<br>(ng/mL) | SERS | DFM  |
|--------------------------|------|------|
| 10 <sup>3</sup>          | 0.34 | 0.04 |
| 10 <sup>2</sup>          | 0.26 | 0.05 |
| 10 <sup>1</sup>          | 0.35 | 0.05 |
| 10 <sup>0</sup>          | 0.40 | 0.03 |
| 10 <sup>-1</sup>         | 0.28 | 0.01 |
| 10 <sup>-2</sup>         | /    | 0.07 |
| 10 <sup>-3</sup>         | /    | 0.02 |

## References

- 1 M. H. Shin, W. Hong, Y. Sa, L. Chen, Y.-J. Jung, X. Wang, B. Zhao and Y. M. Jung, *Vib. Spectrosc.*, 2014, **72**, 44-49.
- 2 Z. Wang, S. Zong, L. Wu, D. Zhu and Y. Cui, *Chem. Rev.*, 2017, **117**, 7910-7963.
- 3 L. Zhou, F. Ding, H. Chen, W. Ding, W. Zhang and S. Y. Chou, *Anal. Chem.*, 2012, **84**, 4489-4495.
- 4 M. Bauch, K. Toma, M. Toma, Q. Zhang and J. Dostalek, *Plasmonics*, 2013, **9**, 781-799.
- 5 B. A. Prabowo, Y.-F. Chang, Y.-Y. Lee, L.-C. Su, C.-J. Yu, Y.-H. Lin, C. Chou, N.-F. Chiu, H.-C. Lai and K.-C. Liu, *Sensors and Actuators B: Chemical*, 2014, **198**, 424-430.
- 6 B. Prabowo, A. Purwidyantri and K.-C. Liu, *Biosensors*, 2018, **8**, 80.
- 7 B. Zhang, B. Liu, D. Tang, R. Niessner, G. Chen and D. Knopp, *Anal. Chem.*, 2012, **84**, 5392-5399.
- 8 J. Tang and D. Tang, *Microchimica Acta*, 2015, **182**, 2077-2089.
- 9 J. Ling, Y. Li and C. Huang, *Anal. Chem.*, 2009, **81**, 1707-1714.
